# Supplementary material for: Pt nanoparticles under oxidizing conditions – implications of particle size, adsorption sites and oxygen coverage on stability
Source: Royal Society of Chemistry journal article supplement (doi:10.1039/d2na00490a), 2022-01-01
Supplement: d2na00490a1.pdf [file d2na00490a1.pdf]

# Pt nanoparticles under oxidizing conditions – implications of particle size, adsorption sites and oxygen coverage on stability (Supporting information)

Asfaw G. Yohannes,<sup>†,‡,¶</sup> Karin Fink,<sup>†</sup> and Ivan Kondov<sup>\*,‡</sup>

<sup>†</sup>*Institute of Nanotechnology, Karlsruhe Institute of Technology (KIT),  
Hermann-von-Helmholtz-Platz 1, 76344 Eggenstein-Leopoldshafen, Germany*

<sup>‡</sup>*Steinbuch Centre for Computing, Karlsruhe Institute of Technology,  
Hermann-von-Helmholtz-Platz 1, 76344 Eggenstein-Leopoldshafen, Germany*

<sup>¶</sup>*Present address: Department of Chemistry, University of Calgary, 2500 University Drive  
NW, Calgary, Alberta, T2N 1N4, Canada*

E-mail: [ivan.kondov@kit.edu](mailto:ivan.kondov@kit.edu)

# Contents

## List of Figures

|    |                                                                                                                                                                                                                                                        |   |
|----|--------------------------------------------------------------------------------------------------------------------------------------------------------------------------------------------------------------------------------------------------------|---|
| S1 | Cartoons of the PtO <sub>2</sub> nanoparticles. Platinum and oxygen atoms are shown in gray and red colors, respectively . . . . .                                                                                                                     | 4 |
| S2 | Selected lowest-energy configurations at high oxygen coverage exhibiting higher degree of structural reorganization manifested by averaged Pt-Pt nearest-neighbor distance $\langle r_{\text{Pt-Pt}} \rangle_s > 3 \text{ \AA}$ (see Table 7). . . . . | 5 |
| S3 | Dependence of the averaged nearest-neighbor distance between the surface platinum atoms $\langle r_{\text{Pt-Pt}} \rangle_s$ on the oxygen coverage $\Theta$ . . . . .                                                                                 | 6 |

## List of Tables

|    |                                                                                                                                                                                                                                                                                                                                                                                                                                                                                                                                                                                                                                                                                                        |    |
|----|--------------------------------------------------------------------------------------------------------------------------------------------------------------------------------------------------------------------------------------------------------------------------------------------------------------------------------------------------------------------------------------------------------------------------------------------------------------------------------------------------------------------------------------------------------------------------------------------------------------------------------------------------------------------------------------------------------|----|
| S1 | Structural properties of the computed configurations (see Table S2) for configuration descriptions: Coverage $\Theta$ (in monolayer, ML), adsorption energy per O atom $\overline{E}_{\text{ads}}$ (in eV), averaged Pt-Pt nearest-neighbor distance for surface Pt atoms $\langle r_{\text{Pt-Pt}} \rangle_s$ (in $\text{\AA}$ ), averaged Pt-Pt nearest-neighbor distance for all Pt atoms $\langle r_{\text{Pt-Pt}} \rangle$ (in $\text{\AA}$ ), averaged Pt-O distance $\langle r_{\text{Pt-O}} \rangle$ (in $\text{\AA}$ ), averaged Pt-Pt coordination number $\langle \text{CN}_{\text{Pt-Pt}} \rangle$ , averaged Pt-O coordination number $\langle \text{CN}_{\text{Pt-O}} \rangle$ . . . . . | 6  |
| S2 | Full list of the computed configurations specified by the number of oxygen atoms $N_s$ of the specified site, coordination number CN and generalized coordination number $\overline{\text{CN}}$ . The list ordering is the same as in Table S1. . . . .                                                                                                                                                                                                                                                                                                                                                                                                                                                | 16 |
| S3 | Averaged Pt-Pt nearest-neighbor distances $\langle r_{\text{Pt-Pt}} \rangle$ (in $\text{\AA}$ ), averaged Pt-Pt coordination numbers $\langle \text{CN}_{\text{Pt-Pt}} \rangle$ , averaged Pt-O nearest-neighbor distances $\langle r_{\text{Pt-O}} \rangle$ and averaged Pt-O coordination numbers $\langle \text{CN}_{\text{Pt-O}} \rangle$ calculated for different model systems. . . . .                                                                                                                                                                                                                                                                                                          | 29 |

|    |                                                                                                                                                                                                                                                        |    |
|----|--------------------------------------------------------------------------------------------------------------------------------------------------------------------------------------------------------------------------------------------------------|----|
| S4 | Formation energies of the Pt nanoparticles and two extended Pt surfaces relative to bulk fcc Pt, and the formation energies PtO <sub>2</sub> nanoparticles relative to the formation energy of bulk PtO <sub>2</sub> , each in eV per Pt atom. . . . . | 29 |
|----|--------------------------------------------------------------------------------------------------------------------------------------------------------------------------------------------------------------------------------------------------------|----|

## Listings

|    |                                                                                                                             |    |
|----|-----------------------------------------------------------------------------------------------------------------------------|----|
| S1 | Structure of the bulk $\beta$ -PtO <sub>2</sub> (in CIF format) used to create the PtO <sub>2</sub> nanoparticles . . . . . | 30 |
|----|-----------------------------------------------------------------------------------------------------------------------------|----|

## Tabulating $\Delta\tilde{\mu}_{\text{O}_2}(T, p_0)$

The data set and the formulas used to tabulate the O<sub>2</sub> chemical potential at standard pressure for different temperatures  $\Delta\tilde{\mu}_{\text{O}_2}(T, p_0)$  that is used in Eq. (6) can be found under this link: <https://webbook.nist.gov/cgi/cbook.cgi?ID=C7782447> in the section **Gas phase thermochemistry data**.

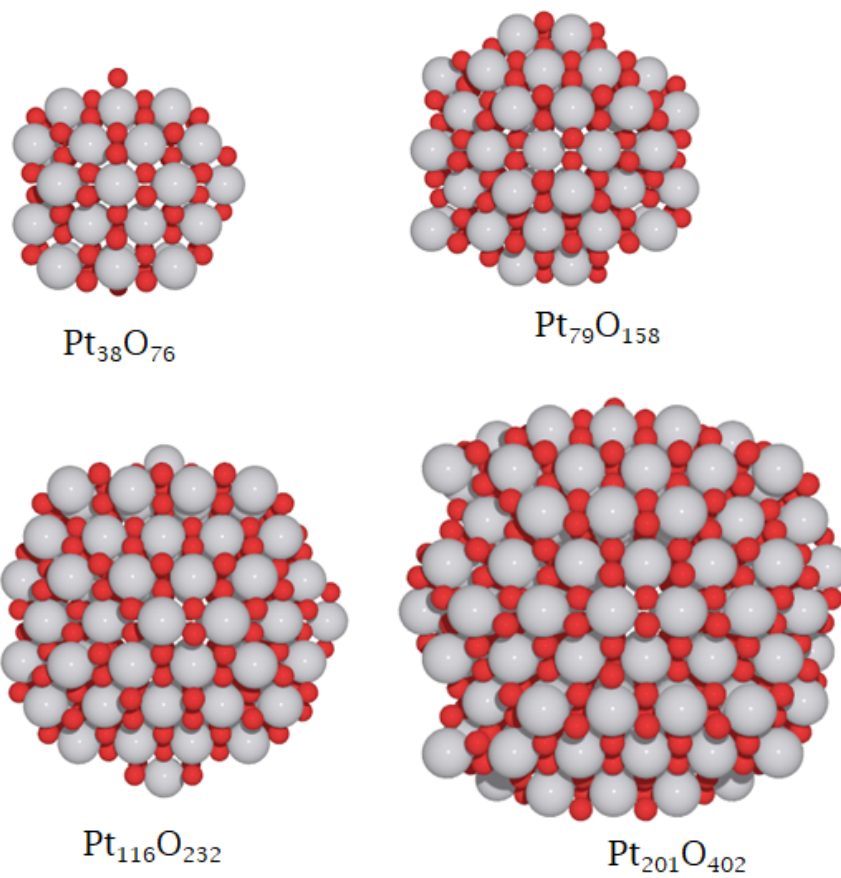

Figure S1: Cartoons of the PtO<sub>2</sub> nanoparticles. Platinum and oxygen atoms are shown in gray and red colors, respectively

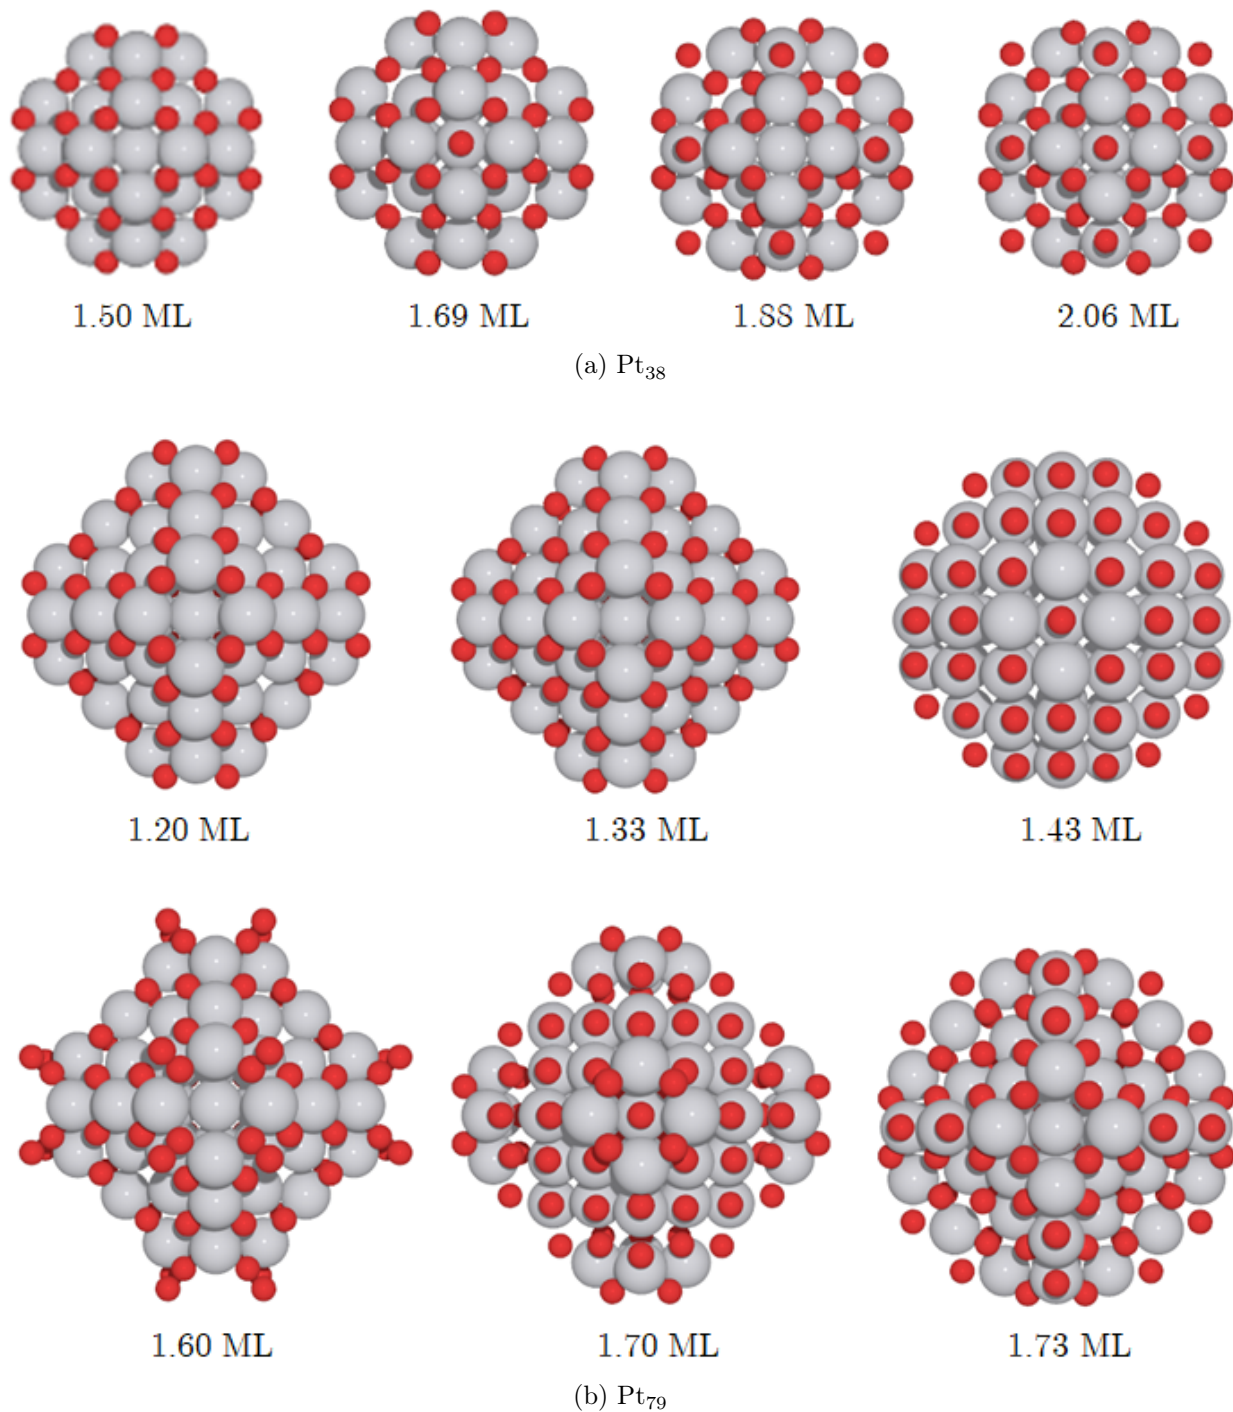

Figure S2: Selected lowest-energy configurations at high oxygen coverage exhibiting higher degree of structural reorganization manifested by averaged Pt-Pt nearest-neighbor distance  $\langle r_{\text{Pt-Pt}} \rangle_s > 3 \text{ \AA}$  (see Table 7).

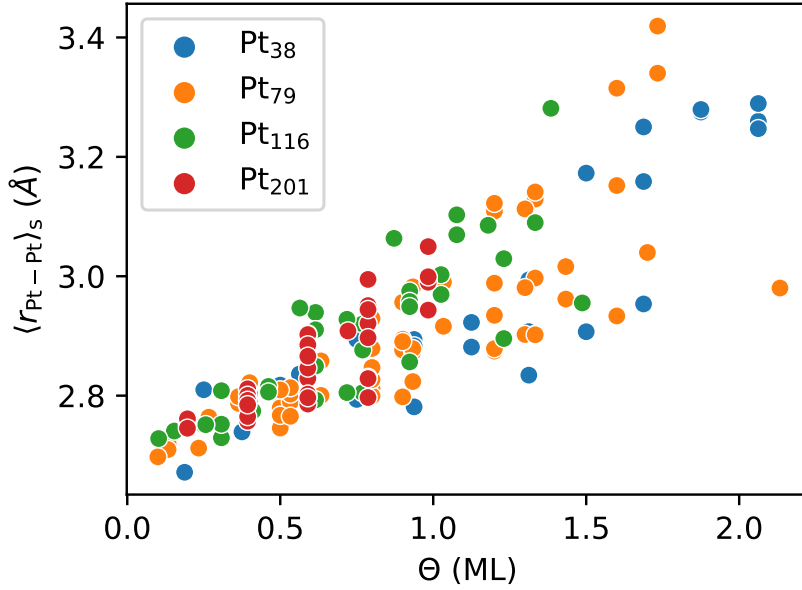

Figure S3: Dependence of the averaged nearest-neighbor distance between the surface platinum atoms  $\langle r_{\text{Pt-Pt}} \rangle_s$  on the oxygen coverage  $\Theta$ .

**Table S1: Structural properties of the computed configurations (see Table S2) for configuration descriptions: Coverage  $\Theta$  (in monolayer, ML), adsorption energy per O atom  $\bar{E}_{\text{ads}}$  (in eV), averaged Pt-Pt nearest-neighbor distance for surface Pt atoms  $\langle r_{\text{Pt-Pt}} \rangle_s$  (in Å), averaged Pt-Pt nearest-neighbor distance for all Pt atoms  $\langle r_{\text{Pt-Pt}} \rangle$  (in Å), averaged Pt-O distance  $\langle r_{\text{Pt-O}} \rangle$  (in Å), averaged Pt-Pt coordination number  $\langle \text{CN}_{\text{Pt-Pt}} \rangle$ , averaged Pt-O coordination number  $\langle \text{CN}_{\text{Pt-O}} \rangle$ .**

| # | Formula                         | $\Theta$ (ML) | $\bar{E}_{\text{ads}}$ | $\langle r_{\text{Pt-Pt}} \rangle_s$ | $\langle r_{\text{Pt-Pt}} \rangle$ | $\langle r_{\text{Pt-O}} \rangle$ | $\langle \text{CN}_{\text{Pt-Pt}} \rangle$ | $\langle \text{CN}_{\text{Pt-O}} \rangle$ |
|---|---------------------------------|---------------|------------------------|--------------------------------------|------------------------------------|-----------------------------------|--------------------------------------------|-------------------------------------------|
| 1 | Pt <sub>38</sub> O <sub>1</sub> | 0.03          | -1.69                  | 2.68                                 | 2.73                               | 2.06                              | 7.4                                        | 0.1                                       |
| 2 | Pt <sub>38</sub> O <sub>1</sub> | 0.03          | -1.61                  | 2.68                                 | 2.73                               | 1.94                              | 7.6                                        | 0.1                                       |
| 3 | Pt <sub>38</sub> O <sub>1</sub> | 0.03          | -1.58                  | 2.68                                 | 2.73                               | 2.06                              | 7.4                                        | 0.1                                       |
| 4 | Pt <sub>38</sub> O <sub>1</sub> | 0.03          | -1.27                  | 2.68                                 | 2.73                               | 2.23                              | 7.6                                        | 0.1                                       |
| 5 | Pt <sub>38</sub> O <sub>1</sub> | 0.03          | -1.23                  | 2.71                                 | 2.73                               | 1.93                              | 7.6                                        | 0.1                                       |
| 6 | Pt <sub>38</sub> O <sub>1</sub> | 0.03          | -1.03                  | 2.68                                 | 2.73                               | 1.77                              | 7.6                                        | 0.0                                       |
| 7 | Pt <sub>38</sub> O <sub>1</sub> | 0.03          | -0.47                  | 2.68                                 | 2.73                               | 1.77                              | 7.4                                        | 0.0                                       |
| 8 | Pt <sub>38</sub> O <sub>6</sub> | 0.19          | -1.36                  | 2.67                                 | 2.75                               | 2.25                              | 7.6                                        | 0.6                                       |
| 9 | Pt <sub>38</sub> O <sub>8</sub> | 0.25          | -1.69                  | 2.75                                 | 2.71                               | 2.06                              | 6.3                                        | 0.6                                       |

**Table S1: (continued)**

| #  | Formula                          | $\Theta$ | $\overline{E}_{\text{ads}}$ | $\langle r_{\text{Pt-Pt}} \rangle_{\text{s}}$ | $\langle r_{\text{Pt-Pt}} \rangle$ | $\langle r_{\text{Pt-O}} \rangle$ | $\langle \text{CN}_{\text{Pt-Pt}} \rangle$ | $\langle \text{CN}_{\text{Pt-O}} \rangle$ |
|----|----------------------------------|----------|-----------------------------|-----------------------------------------------|------------------------------------|-----------------------------------|--------------------------------------------|-------------------------------------------|
| 10 | Pt <sub>38</sub> O <sub>8</sub>  | 0.25     | -1.55                       | 2.81                                          | 2.68                               | 2.04                              | 5.9                                        | 0.6                                       |
| 11 | Pt <sub>38</sub> O <sub>12</sub> | 0.38     | -1.42                       | 2.74                                          | 2.75                               | 1.95                              | 7.6                                        | 0.6                                       |
| 12 | Pt <sub>38</sub> O <sub>16</sub> | 0.50     | -1.49                       | 2.82                                          | 2.78                               | 2.05                              | 6.3                                        | 1.3                                       |
| 13 | Pt <sub>38</sub> O <sub>16</sub> | 0.50     | -1.21                       | 2.78                                          | 2.82                               | 2.07                              | 7.2                                        | 1.3                                       |
| 14 | Pt <sub>38</sub> O <sub>18</sub> | 0.56     | -1.18                       | 2.84                                          | 2.82                               | 2.02                              | 7.6                                        | 1.3                                       |
| 15 | Pt <sub>38</sub> O <sub>24</sub> | 0.75     | -1.26                       | 2.89                                          | 2.95                               | 1.99                              | 7.6                                        | 1.9                                       |
| 16 | Pt <sub>38</sub> O <sub>24</sub> | 0.75     | -1.10                       | 2.79                                          | 2.80                               | 1.95                              | 7.6                                        | 1.3                                       |
| 17 | Pt <sub>38</sub> O <sub>24</sub> | 0.75     | -0.96                       | 2.80                                          | 2.76                               | 2.10                              | 6.3                                        | 1.9                                       |
| 18 | Pt <sub>38</sub> O <sub>30</sub> | 0.94     | -1.02                       | 2.88                                          | 2.95                               | 2.08                              | 7.6                                        | 2.5                                       |
| 19 | Pt <sub>38</sub> O <sub>30</sub> | 0.94     | -0.90                       | 2.89                                          | 2.88                               | 2.09                              | 7.6                                        | 2.5                                       |
| 20 | Pt <sub>38</sub> O <sub>30</sub> | 0.94     | -0.28                       | 2.78                                          | 2.79                               | 1.97                              | 7.6                                        | 1.3                                       |
| 21 | Pt <sub>38</sub> O <sub>36</sub> | 1.12     | -1.06                       | 2.92                                          | 2.93                               | 2.00                              | 7.6                                        | 2.5                                       |
| 22 | Pt <sub>38</sub> O <sub>36</sub> | 1.12     | -0.66                       | 2.88                                          | 2.86                               | 1.95                              | 7.6                                        | 1.9                                       |
| 23 | Pt <sub>38</sub> O <sub>36</sub> | 1.12     | -0.37                       | 2.88                                          | 2.68                               | 1.83                              | 3.8                                        | 1.3                                       |
| 24 | Pt <sub>38</sub> O <sub>42</sub> | 1.31     | -1.04                       | 2.99                                          | 3.00                               | 2.04                              | 7.6                                        | 3.2                                       |
| 25 | Pt <sub>38</sub> O <sub>42</sub> | 1.31     | -0.24                       | 2.83                                          | 2.83                               | 2.01                              | 7.6                                        | 1.9                                       |
| 26 | Pt <sub>38</sub> O <sub>42</sub> | 1.31     | 0.11                        | 2.91                                          | 2.89                               | 2.09                              | 7.6                                        | 2.5                                       |
| 27 | Pt <sub>38</sub> O <sub>48</sub> | 1.50     | -1.20                       | 3.17                                          | 3.06                               | 1.98                              | 6.3                                        | 3.2                                       |
| 28 | Pt <sub>38</sub> O <sub>48</sub> | 1.50     | -1.19                       | 3.17                                          | 3.06                               | 1.98                              | 6.3                                        | 3.2                                       |
| 29 | Pt <sub>38</sub> O <sub>48</sub> | 1.50     | 0.01                        | 2.91                                          | 2.91                               | 2.19                              | 7.6                                        | 3.2                                       |
| 30 | Pt <sub>38</sub> O <sub>54</sub> | 1.69     | -0.90                       | 3.25                                          | 3.10                               | 2.07                              | 6.3                                        | 3.9                                       |
| 31 | Pt <sub>38</sub> O <sub>54</sub> | 1.69     | -0.83                       | 3.16                                          | 3.05                               | 1.99                              | 6.3                                        | 3.2                                       |
| 32 | Pt <sub>38</sub> O <sub>54</sub> | 1.69     | 0.20                        | 2.95                                          | 2.94                               | 2.12                              | 7.6                                        | 3.2                                       |
| 33 | Pt <sub>38</sub> O <sub>60</sub> | 1.88     | -0.68                       | 3.28                                          | 2.98                               | 2.02                              | 5.1                                        | 3.8                                       |

**Table S1: (continued)**

| #  | Formula                          | $\Theta$ | $\bar{E}_{\text{ads}}$ | $\langle r_{\text{Pt-Pt}} \rangle_{\text{s}}$ | $\langle r_{\text{Pt-Pt}} \rangle$ | $\langle r_{\text{Pt-O}} \rangle$ | $\langle \text{CN}_{\text{Pt-Pt}} \rangle$ | $\langle \text{CN}_{\text{Pt-O}} \rangle$ |
|----|----------------------------------|----------|------------------------|-----------------------------------------------|------------------------------------|-----------------------------------|--------------------------------------------|-------------------------------------------|
| 34 | Pt <sub>38</sub> O <sub>60</sub> | 1.88     | -0.53                  | 3.28                                          | 3.02                               | 2.01                              | 5.1                                        | 3.8                                       |
| 35 | Pt <sub>38</sub> O <sub>66</sub> | 2.06     | -0.51                  | 3.25                                          | 3.07                               | 2.08                              | 6.3                                        | 4.6                                       |
| 36 | Pt <sub>38</sub> O <sub>66</sub> | 2.06     | -0.26                  | 3.29                                          | 3.03                               | 2.03                              | 5.1                                        | 3.8                                       |
| 37 | Pt <sub>38</sub> O <sub>66</sub> | 2.06     | -0.15                  | 3.26                                          | 2.79                               | 2.04                              | 3.2                                        | 3.8                                       |
| 38 | Pt <sub>79</sub> O <sub>1</sub>  | 0.02     | -1.48                  | 2.70                                          | 2.75                               | 1.94                              | 8.5                                        | 0.0                                       |
| 39 | Pt <sub>79</sub> O <sub>1</sub>  | 0.02     | -1.47                  | 2.70                                          | 2.75                               | 1.93                              | 8.5                                        | 0.0                                       |
| 40 | Pt <sub>79</sub> O <sub>1</sub>  | 0.02     | -1.40                  | 2.70                                          | 2.75                               | 2.05                              | 8.5                                        | 0.0                                       |
| 41 | Pt <sub>79</sub> O <sub>1</sub>  | 0.02     | -1.40                  | 2.70                                          | 2.75                               | 2.01                              | 8.5                                        | 0.0                                       |
| 42 | Pt <sub>79</sub> O <sub>1</sub>  | 0.02     | -1.34                  | 2.70                                          | 2.75                               | 2.05                              | 8.5                                        | 0.0                                       |
| 43 | Pt <sub>79</sub> O <sub>1</sub>  | 0.02     | -1.32                  | 2.70                                          | 2.75                               | 2.24                              | 8.5                                        | 0.1                                       |
| 44 | Pt <sub>79</sub> O <sub>1</sub>  | 0.02     | -1.22                  | 2.70                                          | 2.75                               | 2.04                              | 8.4                                        | 0.0                                       |
| 45 | Pt <sub>79</sub> O <sub>1</sub>  | 0.02     | -0.92                  | 2.70                                          | 2.75                               | 1.77                              | 8.5                                        | 0.0                                       |
| 46 | Pt <sub>79</sub> O <sub>1</sub>  | 0.02     | -0.43                  | 2.70                                          | 2.75                               | 1.79                              | 8.5                                        | 0.0                                       |
| 47 | Pt <sub>79</sub> O <sub>1</sub>  | 0.02     | -0.12                  | 2.70                                          | 2.75                               | 1.80                              | 8.5                                        | 0.0                                       |
| 48 | Pt <sub>79</sub> O <sub>6</sub>  | 0.10     | -1.18                  | 2.70                                          | 2.75                               | 2.25                              | 8.5                                        | 0.3                                       |
| 49 | Pt <sub>79</sub> O <sub>8</sub>  | 0.13     | -1.40                  | 2.72                                          | 2.77                               | 2.04                              | 8.5                                        | 0.3                                       |
| 50 | Pt <sub>79</sub> O <sub>8</sub>  | 0.13     | -1.33                  | 2.71                                          | 2.80                               | 2.00                              | 8.5                                        | 0.3                                       |
| 51 | Pt <sub>79</sub> O <sub>14</sub> | 0.23     | -1.07                  | 2.71                                          | 2.80                               | 2.12                              | 8.5                                        | 0.6                                       |
| 52 | Pt <sub>79</sub> O <sub>16</sub> | 0.27     | -1.33                  | 2.76                                          | 2.77                               | 2.03                              | 7.9                                        | 0.6                                       |
| 53 | Pt <sub>79</sub> O <sub>24</sub> | 0.40     | -1.40                  | 2.78                                          | 2.82                               | 2.01                              | 8.5                                        | 0.9                                       |
| 54 | Pt <sub>79</sub> O <sub>24</sub> | 0.40     | -1.28                  | 2.79                                          | 2.79                               | 1.93                              | 8.5                                        | 0.6                                       |
| 55 | Pt <sub>79</sub> O <sub>24</sub> | 0.40     | -1.25                  | 2.82                                          | 2.82                               | 2.03                              | 8.5                                        | 0.9                                       |
| 56 | Pt <sub>79</sub> O <sub>24</sub> | 0.40     | -1.18                  | 2.77                                          | 2.78                               | 2.17                              | 8.5                                        | 0.9                                       |
| 57 | Pt <sub>79</sub> O <sub>24</sub> | 0.40     | -1.12                  | 2.80                                          | 2.81                               | 2.07                              | 8.5                                        | 0.9                                       |



**Table S1: (continued)**

| #  | Formula                          | $\Theta$ | $\overline{E}_{\text{ads}}$ | $\langle r_{\text{Pt-Pt}} \rangle_{\text{s}}$ | $\langle r_{\text{Pt-Pt}} \rangle$ | $\langle r_{\text{Pt-O}} \rangle$ | $\langle \text{CN}_{\text{Pt-Pt}} \rangle$ | $\langle \text{CN}_{\text{Pt-O}} \rangle$ |
|----|----------------------------------|----------|-----------------------------|-----------------------------------------------|------------------------------------|-----------------------------------|--------------------------------------------|-------------------------------------------|
| 58 | Pt <sub>79</sub> O <sub>24</sub> | 0.40     | -0.91                       | 2.78                                          | 2.86                               | 2.02                              | 8.5                                        | 0.9                                       |
| 59 | Pt <sub>79</sub> O <sub>30</sub> | 0.50     | -1.15                       | 2.77                                          | 2.82                               | 2.10                              | 8.5                                        | 1.2                                       |
| 60 | Pt <sub>79</sub> O <sub>30</sub> | 0.50     | -1.06                       | 2.81                                          | 2.81                               | 1.99                              | 8.5                                        | 0.9                                       |
| 61 | Pt <sub>79</sub> O <sub>30</sub> | 0.50     | -0.87                       | 2.78                                          | 2.86                               | 2.08                              | 8.5                                        | 1.2                                       |
| 62 | Pt <sub>79</sub> O <sub>30</sub> | 0.50     | -0.28                       | 2.75                                          | 2.77                               | 1.98                              | 8.5                                        | 0.6                                       |
| 63 | Pt <sub>79</sub> O <sub>32</sub> | 0.53     | -1.17                       | 2.80                                          | 2.81                               | 1.97                              | 8.5                                        | 0.9                                       |
| 64 | Pt <sub>79</sub> O <sub>32</sub> | 0.53     | -1.09                       | 2.77                                          | 2.79                               | 1.99                              | 8.5                                        | 0.9                                       |
| 65 | Pt <sub>79</sub> O <sub>32</sub> | 0.53     | -1.03                       | 2.81                                          | 2.83                               | 2.03                              | 8.5                                        | 1.2                                       |
| 66 | Pt <sub>79</sub> O <sub>32</sub> | 0.53     | -0.20                       | 2.79                                          | 2.73                               | 1.90                              | 6.4                                        | 0.6                                       |
| 67 | Pt <sub>79</sub> O <sub>38</sub> | 0.63     | -1.03                       | 2.86                                          | 2.84                               | 1.99                              | 8.5                                        | 1.2                                       |
| 68 | Pt <sub>79</sub> O <sub>38</sub> | 0.63     | -0.86                       | 2.80                                          | 2.83                               | 2.09                              | 8.5                                        | 1.5                                       |
| 69 | Pt <sub>79</sub> O <sub>48</sub> | 0.80     | -1.04                       | 2.93                                          | 2.85                               | 2.08                              | 8.2                                        | 1.8                                       |
| 70 | Pt <sub>79</sub> O <sub>48</sub> | 0.80     | -1.03                       | 2.85                                          | 2.84                               | 2.00                              | 8.5                                        | 1.5                                       |
| 71 | Pt <sub>79</sub> O <sub>48</sub> | 0.80     | -0.95                       | 2.83                                          | 2.84                               | 2.01                              | 8.5                                        | 1.5                                       |
| 72 | Pt <sub>79</sub> O <sub>48</sub> | 0.80     | -0.93                       | 2.84                                          | 2.88                               | 2.00                              | 8.5                                        | 1.5                                       |
| 73 | Pt <sub>79</sub> O <sub>48</sub> | 0.80     | -0.91                       | 2.88                                          | 2.91                               | 2.02                              | 8.5                                        | 1.8                                       |
| 74 | Pt <sub>79</sub> O <sub>48</sub> | 0.80     | -0.74                       | 2.81                                          | 2.80                               | 1.96                              | 8.5                                        | 1.2                                       |
| 75 | Pt <sub>79</sub> O <sub>48</sub> | 0.80     | -0.14                       | 2.80                                          | 2.83                               | 2.14                              | 8.5                                        | 1.5                                       |
| 76 | Pt <sub>79</sub> O <sub>54</sub> | 0.90     | -1.11                       | 2.96                                          | 2.91                               | 2.06                              | 8.5                                        | 2.1                                       |
| 77 | Pt <sub>79</sub> O <sub>54</sub> | 0.90     | -1.02                       | 2.89                                          | 2.87                               | 2.03                              | 8.5                                        | 1.8                                       |
| 78 | Pt <sub>79</sub> O <sub>54</sub> | 0.90     | -0.88                       | 2.89                                          | 2.90                               | 2.02                              | 7.9                                        | 1.8                                       |
| 79 | Pt <sub>79</sub> O <sub>54</sub> | 0.90     | -0.80                       | 2.88                                          | 2.92                               | 2.06                              | 8.5                                        | 2.1                                       |
| 80 | Pt <sub>79</sub> O <sub>54</sub> | 0.90     | -0.36                       | 2.80                                          | 2.79                               | 1.99                              | 8.5                                        | 1.2                                       |
| 81 | Pt <sub>79</sub> O <sub>56</sub> | 0.93     | -0.97                       | 2.88                                          | 2.86                               | 2.01                              | 8.5                                        | 1.8                                       |

**Table S1: (continued)**

| #   | Formula                          | $\Theta$ | $\overline{E}_{\text{ads}}$ | $\langle r_{\text{Pt-Pt}} \rangle_{\text{s}}$ | $\langle r_{\text{Pt-Pt}} \rangle$ | $\langle r_{\text{Pt-O}} \rangle$ | $\langle \text{CN}_{\text{Pt-Pt}} \rangle$ | $\langle \text{CN}_{\text{Pt-O}} \rangle$ |
|-----|----------------------------------|----------|-----------------------------|-----------------------------------------------|------------------------------------|-----------------------------------|--------------------------------------------|-------------------------------------------|
| 82  | Pt <sub>79</sub> O <sub>56</sub> | 0.93     | -0.93                       | 2.98                                          | 2.89                               | 2.07                              | 8.2                                        | 2.1                                       |
| 83  | Pt <sub>79</sub> O <sub>56</sub> | 0.93     | -0.79                       | 2.82                                          | 2.81                               | 1.98                              | 8.5                                        | 1.5                                       |
| 84  | Pt <sub>79</sub> O <sub>56</sub> | 0.93     | -0.58                       | 2.87                                          | 2.77                               | 2.00                              | 5.5                                        | 1.8                                       |
| 85  | Pt <sub>79</sub> O <sub>62</sub> | 1.03     | -1.00                       | 2.99                                          | 2.92                               | 2.06                              | 8.2                                        | 2.4                                       |
| 86  | Pt <sub>79</sub> O <sub>62</sub> | 1.03     | -0.98                       | 2.92                                          | 2.89                               | 2.04                              | 8.5                                        | 2.1                                       |
| 87  | Pt <sub>79</sub> O <sub>72</sub> | 1.20     | -1.22                       | 3.12                                          | 2.92                               | 1.99                              | 6.7                                        | 2.4                                       |
| 88  | Pt <sub>79</sub> O <sub>72</sub> | 1.20     | -1.22                       | 3.12                                          | 2.92                               | 1.99                              | 6.7                                        | 2.4                                       |
| 89  | Pt <sub>79</sub> O <sub>72</sub> | 1.20     | -0.74                       | 2.93                                          | 2.92                               | 2.02                              | 8.5                                        | 2.4                                       |
| 90  | Pt <sub>79</sub> O <sub>72</sub> | 1.20     | -0.73                       | 2.99                                          | 2.92                               | 2.03                              | 8.5                                        | 2.1                                       |
| 91  | Pt <sub>79</sub> O <sub>72</sub> | 1.20     | -0.73                       | 3.11                                          | 2.78                               | 2.01                              | 6.1                                        | 2.1                                       |
| 92  | Pt <sub>79</sub> O <sub>72</sub> | 1.20     | -0.68                       | 2.87                                          | 2.87                               | 2.00                              | 8.5                                        | 2.1                                       |
| 93  | Pt <sub>79</sub> O <sub>72</sub> | 1.20     | -0.27                       | 2.88                                          | 2.91                               | 2.02                              | 8.5                                        | 1.8                                       |
| 94  | Pt <sub>79</sub> O <sub>78</sub> | 1.30     | -0.96                       | 3.11                                          | 2.98                               | 2.00                              | 7.9                                        | 2.4                                       |
| 95  | Pt <sub>79</sub> O <sub>78</sub> | 1.30     | -0.76                       | 2.98                                          | 2.95                               | 2.04                              | 8.5                                        | 2.7                                       |
| 96  | Pt <sub>79</sub> O <sub>78</sub> | 1.30     | -0.40                       | 2.90                                          | 2.79                               | 2.09                              | 6.4                                        | 2.4                                       |
| 97  | Pt <sub>79</sub> O <sub>80</sub> | 1.33     | -1.11                       | 3.14                                          | 3.00                               | 2.01                              | 7.9                                        | 2.7                                       |
| 98  | Pt <sub>79</sub> O <sub>80</sub> | 1.33     | -0.67                       | 3.00                                          | 2.93                               | 2.04                              | 8.5                                        | 2.4                                       |
| 99  | Pt <sub>79</sub> O <sub>80</sub> | 1.33     | -0.67                       | 3.13                                          | 2.79                               | 2.03                              | 6.1                                        | 2.4                                       |
| 100 | Pt <sub>79</sub> O <sub>80</sub> | 1.33     | -0.62                       | 2.90                                          | 2.84                               | 1.98                              | 7.0                                        | 2.1                                       |
| 101 | Pt <sub>79</sub> O <sub>80</sub> | 1.33     | -0.62                       | 2.90                                          | 2.84                               | 1.98                              | 7.0                                        | 2.1                                       |
| 102 | Pt <sub>79</sub> O <sub>86</sub> | 1.43     | -0.66                       | 3.02                                          | 2.99                               | 2.09                              | 6.7                                        | 3.3                                       |
| 103 | Pt <sub>79</sub> O <sub>86</sub> | 1.43     | -0.37                       | 2.96                                          | 2.83                               | 2.09                              | 6.4                                        | 2.7                                       |
| 104 | Pt <sub>79</sub> O <sub>96</sub> | 1.60     | -0.62                       | 3.15                                          | 2.93                               | 2.02                              | 6.7                                        | 2.4                                       |
| 105 | Pt <sub>79</sub> O <sub>96</sub> | 1.60     | -0.60                       | 3.32                                          | 2.77                               | 2.02                              | 4.6                                        | 3.0                                       |

**Table S1: (continued)**

| #   | Formula                           | $\Theta$ | $\bar{E}_{\text{ads}}$ | $\langle r_{\text{Pt-Pt}} \rangle_{\text{s}}$ | $\langle r_{\text{Pt-Pt}} \rangle$ | $\langle r_{\text{Pt-O}} \rangle$ | $\langle \text{CN}_{\text{Pt-Pt}} \rangle$ | $\langle \text{CN}_{\text{Pt-O}} \rangle$ |
|-----|-----------------------------------|----------|------------------------|-----------------------------------------------|------------------------------------|-----------------------------------|--------------------------------------------|-------------------------------------------|
| 106 | Pt <sub>79</sub> O <sub>96</sub>  | 1.60     | -0.30                  | 2.93                                          | 2.92                               | 2.02                              | 8.5                                        | 2.4                                       |
| 107 | Pt <sub>79</sub> O <sub>102</sub> | 1.70     | -0.49                  | 3.04                                          | 2.88                               | 2.07                              | 6.1                                        | 3.4                                       |
| 108 | Pt <sub>79</sub> O <sub>104</sub> | 1.73     | -0.52                  | 3.34                                          | 2.79                               | 2.03                              | 4.6                                        | 3.3                                       |
| 109 | Pt <sub>79</sub> O <sub>104</sub> | 1.73     | -0.44                  | 3.42                                          | 2.82                               | 1.96                              | 3.9                                        | 2.7                                       |
| 110 | Pt <sub>79</sub> O <sub>128</sub> | 2.13     | -0.12                  | 2.98                                          | 2.87                               | 1.96                              | 7.3                                        | 1.5                                       |
| 111 | Pt <sub>116</sub> O <sub>1</sub>  | 0.01     | -1.63                  | 2.72                                          | 2.75                               | 1.93                              | 8.9                                        | 0.0                                       |
| 112 | Pt <sub>116</sub> O <sub>1</sub>  | 0.01     | -1.49                  | 2.72                                          | 2.75                               | 1.95                              | 8.9                                        | 0.0                                       |
| 113 | Pt <sub>116</sub> O <sub>1</sub>  | 0.01     | -1.40                  | 2.72                                          | 2.75                               | 2.09                              | 8.9                                        | 0.0                                       |
| 114 | Pt <sub>116</sub> O <sub>1</sub>  | 0.01     | -1.39                  | 2.72                                          | 2.75                               | 2.07                              | 8.9                                        | 0.0                                       |
| 115 | Pt <sub>116</sub> O <sub>1</sub>  | 0.01     | -1.33                  | 2.72                                          | 2.75                               | 1.94                              | 8.9                                        | 0.0                                       |
| 116 | Pt <sub>116</sub> O <sub>1</sub>  | 0.01     | -1.24                  | 2.72                                          | 2.75                               | 2.04                              | 8.9                                        | 0.0                                       |
| 117 | Pt <sub>116</sub> O <sub>1</sub>  | 0.01     | -1.23                  | 2.72                                          | 2.76                               | 2.04                              | 8.9                                        | 0.0                                       |
| 118 | Pt <sub>116</sub> O <sub>1</sub>  | 0.01     | -1.01                  | 2.72                                          | 2.76                               | 2.02                              | 8.9                                        | 0.0                                       |
| 119 | Pt <sub>116</sub> O <sub>1</sub>  | 0.01     | -0.87                  | 2.72                                          | 2.75                               | 1.77                              | 8.9                                        | 0.0                                       |
| 120 | Pt <sub>116</sub> O <sub>1</sub>  | 0.01     | -0.56                  | 2.72                                          | 2.75                               | 1.78                              | 8.9                                        | 0.0                                       |
| 121 | Pt <sub>116</sub> O <sub>1</sub>  | 0.01     | -0.25                  | 2.71                                          | 2.75                               | 1.81                              | 8.9                                        | 0.0                                       |
| 122 | Pt <sub>116</sub> O <sub>8</sub>  | 0.10     | -1.04                  | 2.73                                          | 2.79                               | 2.01                              | 8.9                                        | 0.2                                       |
| 123 | Pt <sub>116</sub> O <sub>12</sub> | 0.15     | -1.47                  | 2.74                                          | 2.76                               | 1.95                              | 8.9                                        | 0.2                                       |
| 124 | Pt <sub>116</sub> O <sub>20</sub> | 0.26     | -1.07                  | 2.75                                          | 2.77                               | 2.00                              | 8.9                                        | 0.4                                       |
| 125 | Pt <sub>116</sub> O <sub>24</sub> | 0.31     | -1.08                  | 2.75                                          | 2.78                               | 2.09                              | 8.9                                        | 0.6                                       |
| 126 | Pt <sub>116</sub> O <sub>24</sub> | 0.31     | -0.96                  | 2.81                                          | 2.81                               | 2.05                              | 8.9                                        | 0.6                                       |
| 127 | Pt <sub>116</sub> O <sub>24</sub> | 0.31     | -0.86                  | 2.73                                          | 2.76                               | 2.23                              | 8.5                                        | 0.8                                       |
| 128 | Pt <sub>116</sub> O <sub>32</sub> | 0.41     | -0.76                  | 2.77                                          | 2.79                               | 2.08                              | 8.9                                        | 0.8                                       |
| 129 | Pt <sub>116</sub> O <sub>36</sub> | 0.46     | -1.02                  | 2.81                                          | 2.79                               | 2.09                              | 8.9                                        | 0.8                                       |

**Table S1: (continued)**

| #   | Formula                           | $\Theta$ | $\bar{E}_{\text{ads}}$ | $\langle r_{\text{Pt-Pt}} \rangle_{\text{s}}$ | $\langle r_{\text{Pt-Pt}} \rangle$ | $\langle r_{\text{Pt-O}} \rangle$ | $\langle \text{CN}_{\text{Pt-Pt}} \rangle$ | $\langle \text{CN}_{\text{Pt-O}} \rangle$ |
|-----|-----------------------------------|----------|------------------------|-----------------------------------------------|------------------------------------|-----------------------------------|--------------------------------------------|-------------------------------------------|
| 130 | Pt <sub>116</sub> O <sub>36</sub> | 0.46     | -1.01                  | 2.82                                          | 2.81                               | 2.03                              | 8.9                                        | 0.8                                       |
| 131 | Pt <sub>116</sub> O <sub>44</sub> | 0.56     | -0.94                  | 2.95                                          | 2.83                               | 2.05                              | 8.9                                        | 1.0                                       |
| 132 | Pt <sub>116</sub> O <sub>48</sub> | 0.62     | -1.07                  | 2.79                                          | 2.80                               | 1.95                              | 8.9                                        | 0.8                                       |
| 133 | Pt <sub>116</sub> O <sub>48</sub> | 0.62     | -0.98                  | 2.91                                          | 2.80                               | 2.04                              | 7.4                                        | 1.2                                       |
| 134 | Pt <sub>116</sub> O <sub>48</sub> | 0.62     | -0.97                  | 2.85                                          | 2.85                               | 2.04                              | 8.9                                        | 1.2                                       |
| 135 | Pt <sub>116</sub> O <sub>48</sub> | 0.62     | -0.79                  | 2.94                                          | 2.82                               | 2.12                              | 8.1                                        | 1.2                                       |
| 136 | Pt <sub>116</sub> O <sub>48</sub> | 0.62     | -0.71                  | 2.85                                          | 2.83                               | 2.07                              | 8.9                                        | 1.2                                       |
| 137 | Pt <sub>116</sub> O <sub>56</sub> | 0.72     | -1.00                  | 2.81                                          | 2.81                               | 1.97                              | 8.9                                        | 1.0                                       |
| 138 | Pt <sub>116</sub> O <sub>56</sub> | 0.72     | -0.85                  | 2.93                                          | 2.82                               | 2.04                              | 7.4                                        | 1.4                                       |
| 139 | Pt <sub>116</sub> O <sub>60</sub> | 0.77     | -0.94                  | 2.88                                          | 2.86                               | 2.03                              | 8.9                                        | 1.4                                       |
| 140 | Pt <sub>116</sub> O <sub>60</sub> | 0.77     | -0.87                  | 2.80                                          | 2.80                               | 1.96                              | 8.9                                        | 1.0                                       |
| 141 | Pt <sub>116</sub> O <sub>60</sub> | 0.77     | -0.87                  | 2.92                                          | 2.86                               | 2.05                              | 8.7                                        | 1.4                                       |
| 142 | Pt <sub>116</sub> O <sub>68</sub> | 0.87     | -0.88                  | 3.06                                          | 2.84                               | 1.95                              | 7.7                                        | 1.2                                       |
| 143 | Pt <sub>116</sub> O <sub>72</sub> | 0.92     | -1.25                  | 2.96                                          | 2.88                               | 1.97                              | 8.9                                        | 1.4                                       |
| 144 | Pt <sub>116</sub> O <sub>72</sub> | 0.92     | -1.01                  | 2.95                                          | 2.86                               | 2.07                              | 8.1                                        | 1.9                                       |
| 145 | Pt <sub>116</sub> O <sub>72</sub> | 0.92     | -0.80                  | 2.86                                          | 2.84                               | 2.00                              | 8.9                                        | 1.4                                       |
| 146 | Pt <sub>116</sub> O <sub>72</sub> | 0.92     | -0.73                  | 2.98                                          | 2.88                               | 2.08                              | 8.7                                        | 1.9                                       |
| 147 | Pt <sub>116</sub> O <sub>80</sub> | 1.03     | -1.13                  | 2.97                                          | 2.88                               | 1.99                              | 8.9                                        | 1.7                                       |
| 148 | Pt <sub>116</sub> O <sub>80</sub> | 1.03     | -0.85                  | 3.00                                          | 2.84                               | 2.06                              | 7.2                                        | 2.1                                       |
| 149 | Pt <sub>116</sub> O <sub>84</sub> | 1.08     | -0.96                  | 3.07                                          | 2.94                               | 2.04                              | 8.5                                        | 2.1                                       |
| 150 | Pt <sub>116</sub> O <sub>84</sub> | 1.08     | -0.82                  | 3.10                                          | 2.86                               | 1.98                              | 7.4                                        | 1.7                                       |
| 151 | Pt <sub>116</sub> O <sub>92</sub> | 1.18     | -0.88                  | 3.09                                          | 2.98                               | 2.04                              | 8.9                                        | 2.3                                       |
| 152 | Pt <sub>116</sub> O <sub>96</sub> | 1.23     | -0.96                  | 3.03                                          | 2.92                               | 2.01                              | 8.9                                        | 2.1                                       |
| 153 | Pt <sub>116</sub> O <sub>96</sub> | 1.23     | -0.57                  | 2.90                                          | 2.82                               | 2.03                              | 7.2                                        | 1.7                                       |

**Table S1: (continued)**

| #   | Formula                            | $\Theta$ | $\overline{E}_{\text{ads}}$ | $\langle r_{\text{Pt-Pt}} \rangle_{\text{s}}$ | $\langle r_{\text{Pt-Pt}} \rangle$ | $\langle r_{\text{Pt-O}} \rangle$ | $\langle \text{CN}_{\text{Pt-Pt}} \rangle$ | $\langle \text{CN}_{\text{Pt-O}} \rangle$ |
|-----|------------------------------------|----------|-----------------------------|-----------------------------------------------|------------------------------------|-----------------------------------|--------------------------------------------|-------------------------------------------|
| 154 | Pt <sub>116</sub> O <sub>104</sub> | 1.33     | -0.58                       | 3.09                                          | 2.75                               | 1.96                              | 6.0                                        | 1.4                                       |
| 155 | Pt <sub>116</sub> O <sub>108</sub> | 1.38     | -0.73                       | 3.28                                          | 2.79                               | 1.99                              | 5.4                                        | 2.3                                       |
| 156 | Pt <sub>116</sub> O <sub>116</sub> | 1.49     | -0.44                       | 2.96                                          | 2.86                               | 2.03                              | 7.2                                        | 2.1                                       |
| 157 | Pt <sub>201</sub> O <sub>1</sub>   | 0.01     | -1.53                       | 2.72                                          | 2.77                               | 1.93                              | 9.4                                        | 0.0                                       |
| 158 | Pt <sub>201</sub> O <sub>1</sub>   | 0.01     | -1.31                       | 2.72                                          | 2.77                               | 1.94                              | 9.4                                        | 0.0                                       |
| 159 | Pt <sub>201</sub> O <sub>1</sub>   | 0.01     | -1.31                       | 2.72                                          | 2.77                               | 2.06                              | 9.4                                        | 0.0                                       |
| 160 | Pt <sub>201</sub> O <sub>1</sub>   | 0.01     | -1.22                       | 2.71                                          | 2.77                               | 1.95                              | 9.4                                        | 0.0                                       |
| 161 | Pt <sub>201</sub> O <sub>1</sub>   | 0.01     | -1.18                       | 2.72                                          | 2.77                               | 2.10                              | 9.4                                        | 0.0                                       |
| 162 | Pt <sub>201</sub> O <sub>1</sub>   | 0.01     | -1.17                       | 2.72                                          | 2.77                               | 2.05                              | 9.4                                        | 0.0                                       |
| 163 | Pt <sub>201</sub> O <sub>1</sub>   | 0.01     | -1.11                       | 2.72                                          | 2.77                               | 2.02                              | 9.4                                        | 0.0                                       |
| 164 | Pt <sub>201</sub> O <sub>1</sub>   | 0.01     | -1.08                       | 2.72                                          | 2.77                               | 2.04                              | 9.4                                        | 0.0                                       |
| 165 | Pt <sub>201</sub> O <sub>1</sub>   | 0.01     | -0.99                       | 2.72                                          | 2.77                               | 2.06                              | 9.4                                        | 0.0                                       |
| 166 | Pt <sub>201</sub> O <sub>1</sub>   | 0.01     | -0.83                       | 2.72                                          | 2.77                               | 2.02                              | 9.4                                        | 0.0                                       |
| 167 | Pt <sub>201</sub> O <sub>1</sub>   | 0.01     | -0.80                       | 2.71                                          | 2.77                               | 1.77                              | 9.4                                        | 0.0                                       |
| 168 | Pt <sub>201</sub> O <sub>1</sub>   | 0.01     | -0.56                       | 2.72                                          | 2.77                               | 1.79                              | 9.4                                        | 0.0                                       |
| 169 | Pt <sub>201</sub> O <sub>1</sub>   | 0.01     | -0.54                       | 2.71                                          | 2.77                               | 1.79                              | 9.4                                        | 0.0                                       |
| 170 | Pt <sub>201</sub> O <sub>1</sub>   | 0.01     | -0.07                       | 2.71                                          | 2.77                               | 1.81                              | 9.4                                        | 0.0                                       |
| 171 | Pt <sub>201</sub> O <sub>1</sub>   | 0.01     | 0.15                        | 2.71                                          | 2.77                               | 1.81                              | 9.4                                        | 0.0                                       |
| 172 | Pt <sub>201</sub> O <sub>24</sub>  | 0.20     | -1.23                       | 2.76                                          | 2.78                               | 1.94                              | 9.4                                        | 0.2                                       |
| 173 | Pt <sub>201</sub> O <sub>24</sub>  | 0.20     | -1.02                       | 2.75                                          | 2.80                               | 2.02                              | 9.4                                        | 0.4                                       |
| 174 | Pt <sub>201</sub> O <sub>24</sub>  | 0.20     | -0.90                       | 2.75                                          | 2.78                               | 2.05                              | 9.4                                        | 0.4                                       |
| 175 | Pt <sub>201</sub> O <sub>48</sub>  | 0.39     | -1.28                       | 2.81                                          | 2.81                               | 2.00                              | 9.4                                        | 0.6                                       |
| 176 | Pt <sub>201</sub> O <sub>48</sub>  | 0.39     | -1.19                       | 2.81                                          | 2.81                               | 2.06                              | 9.4                                        | 0.7                                       |
| 177 | Pt <sub>201</sub> O <sub>48</sub>  | 0.39     | -1.08                       | 2.80                                          | 2.79                               | 2.02                              | 9.4                                        | 0.6                                       |

**Table S1: (continued)**

| #   | Formula                           | $\Theta$ | $\overline{E}_{\text{ads}}$ | $\langle r_{\text{Pt-Pt}} \rangle_{\text{s}}$ | $\langle r_{\text{Pt-Pt}} \rangle$ | $\langle r_{\text{Pt-O}} \rangle$ | $\langle \text{CN}_{\text{Pt-Pt}} \rangle$ | $\langle \text{CN}_{\text{Pt-O}} \rangle$ |
|-----|-----------------------------------|----------|-----------------------------|-----------------------------------------------|------------------------------------|-----------------------------------|--------------------------------------------|-------------------------------------------|
| 178 | Pt <sub>201</sub> O <sub>48</sub> | 0.39     | -1.06                       | 2.79                                          | 2.80                               | 1.99                              | 9.4                                        | 0.6                                       |
| 179 | Pt <sub>201</sub> O <sub>48</sub> | 0.39     | -1.04                       | 2.77                                          | 2.78                               | 1.95                              | 9.4                                        | 0.5                                       |
| 180 | Pt <sub>201</sub> O <sub>48</sub> | 0.39     | -0.99                       | 2.78                                          | 2.81                               | 2.04                              | 9.4                                        | 0.7                                       |
| 181 | Pt <sub>201</sub> O <sub>48</sub> | 0.39     | -0.90                       | 2.78                                          | 2.79                               | 2.07                              | 9.4                                        | 0.6                                       |
| 182 | Pt <sub>201</sub> O <sub>48</sub> | 0.39     | -0.76                       | 2.76                                          | 2.80                               | 2.12                              | 9.4                                        | 0.7                                       |
| 183 | Pt <sub>201</sub> O <sub>72</sub> | 0.59     | -1.04                       | 2.90                                          | 2.83                               | 2.04                              | 8.7                                        | 1.1                                       |
| 184 | Pt <sub>201</sub> O <sub>72</sub> | 0.59     | -0.98                       | 2.89                                          | 2.82                               | 2.03                              | 9.1                                        | 1.0                                       |
| 185 | Pt <sub>201</sub> O <sub>72</sub> | 0.59     | -0.95                       | 2.87                                          | 2.83                               | 2.05                              | 9.3                                        | 1.1                                       |
| 186 | Pt <sub>201</sub> O <sub>72</sub> | 0.59     | -0.93                       | 2.80                                          | 2.80                               | 2.00                              | 9.4                                        | 0.8                                       |
| 187 | Pt <sub>201</sub> O <sub>72</sub> | 0.59     | -0.93                       | 2.89                                          | 2.82                               | 2.04                              | 9.4                                        | 1.0                                       |
| 188 | Pt <sub>201</sub> O <sub>72</sub> | 0.59     | -0.92                       | 2.80                                          | 2.81                               | 2.00                              | 9.4                                        | 0.8                                       |
| 189 | Pt <sub>201</sub> O <sub>72</sub> | 0.59     | -0.91                       | 2.83                                          | 2.83                               | 2.01                              | 9.4                                        | 1.0                                       |
| 190 | Pt <sub>201</sub> O <sub>72</sub> | 0.59     | -0.90                       | 2.85                                          | 2.82                               | 2.10                              | 9.4                                        | 1.1                                       |
| 191 | Pt <sub>201</sub> O <sub>72</sub> | 0.59     | -0.84                       | 2.90                                          | 2.82                               | 2.04                              | 9.2                                        | 1.0                                       |
| 192 | Pt <sub>201</sub> O <sub>72</sub> | 0.59     | -0.83                       | 2.80                                          | 2.79                               | 1.96                              | 9.4                                        | 0.7                                       |
| 193 | Pt <sub>201</sub> O <sub>72</sub> | 0.59     | -0.73                       | 2.90                                          | 2.82                               | 2.08                              | 9.0                                        | 1.1                                       |
| 194 | Pt <sub>201</sub> O <sub>72</sub> | 0.59     | -0.38                       | 2.79                                          | 2.78                               | 1.92                              | 8.7                                        | 0.5                                       |
| 195 | Pt <sub>201</sub> O <sub>88</sub> | 0.72     | -1.08                       | 2.91                                          | 2.85                               | 2.02                              | 9.4                                        | 1.2                                       |
| 196 | Pt <sub>201</sub> O <sub>96</sub> | 0.79     | -1.20                       | 2.94                                          | 2.87                               | 1.98                              | 9.4                                        | 1.2                                       |
| 197 | Pt <sub>201</sub> O <sub>96</sub> | 0.79     | -0.95                       | 2.95                                          | 2.88                               | 2.02                              | 9.4                                        | 1.3                                       |
| 198 | Pt <sub>201</sub> O <sub>96</sub> | 0.79     | -0.92                       | 2.99                                          | 2.82                               | 1.98                              | 8.7                                        | 1.1                                       |
| 199 | Pt <sub>201</sub> O <sub>96</sub> | 0.79     | -0.87                       | 2.92                                          | 2.86                               | 2.07                              | 9.3                                        | 1.4                                       |
| 200 | Pt <sub>201</sub> O <sub>96</sub> | 0.79     | -0.84                       | 2.83                                          | 2.81                               | 1.99                              | 9.4                                        | 1.1                                       |
| 201 | Pt <sub>201</sub> O <sub>96</sub> | 0.79     | -0.79                       | 2.83                                          | 2.82                               | 1.99                              | 9.4                                        | 1.1                                       |

**Table S1: (continued)**

| #   | Formula                            | $\Theta$ | $\overline{E}_{\text{ads}}$ | $\langle r_{\text{Pt-Pt}} \rangle_s$ | $\langle r_{\text{Pt-Pt}} \rangle$ | $\langle r_{\text{Pt-O}} \rangle$ | $\langle \text{CN}_{\text{Pt-Pt}} \rangle$ | $\langle \text{CN}_{\text{Pt-O}} \rangle$ |
|-----|------------------------------------|----------|-----------------------------|--------------------------------------|------------------------------------|-----------------------------------|--------------------------------------------|-------------------------------------------|
| 202 | Pt <sub>201</sub> O <sub>96</sub>  | 0.79     | -0.78                       | 2.90                                 | 2.85                               | 2.09                              | 9.4                                        | 1.4                                       |
| 203 | Pt <sub>201</sub> O <sub>96</sub>  | 0.79     | -0.38                       | 2.80                                 | 2.79                               | 1.96                              | 9.4                                        | 0.7                                       |
| 204 | Pt <sub>201</sub> O <sub>120</sub> | 0.98     | -1.11                       | 2.99                                 | 2.87                               | 2.00                              | 9.1                                        | 1.6                                       |
| 205 | Pt <sub>201</sub> O <sub>120</sub> | 0.98     | -1.03                       | 3.00                                 | 2.88                               | 2.01                              | 9.2                                        | 1.6                                       |
| 206 | Pt <sub>201</sub> O <sub>120</sub> | 0.98     | -0.84                       | 3.05                                 | 2.87                               | 2.07                              | 8.8                                        | 1.8                                       |
| 207 | Pt <sub>201</sub> O <sub>120</sub> | 0.98     | -0.75                       | 2.94                                 | 2.86                               | 1.99                              | 9.4                                        | 1.2                                       |

**Table S2: Full list of the computed configurations specified by the number of oxygen atoms  $N_s$  of the specified site, coordination number CN and generalized coordination number  $\overline{\text{CN}}$ . The list ordering is the same as in Table S1.**

| #  | Formula                          | Configuration ( $N_s$ /site type/ $\text{CN}/\overline{\text{CN}}$ ) |
|----|----------------------------------|----------------------------------------------------------------------|
| 1  | Pt <sub>38</sub> O <sub>1</sub>  | 1/hcp/11/4.09                                                        |
| 2  | Pt <sub>38</sub> O <sub>1</sub>  | 1/bridge/8/3.5                                                       |
| 3  | Pt <sub>38</sub> O <sub>1</sub>  | 1/fcc/10/3.68                                                        |
| 4  | Pt <sub>38</sub> O <sub>1</sub>  | 1/trough/9/2.77                                                      |
| 5  | Pt <sub>38</sub> O <sub>1</sub>  | 1/bridge/8/3.67                                                      |
| 6  | Pt <sub>38</sub> O <sub>1</sub>  | 1/ontop/6/4.0                                                        |
| 7  | Pt <sub>38</sub> O <sub>1</sub>  | 1/ontop/9/6.0                                                        |
| 8  | Pt <sub>38</sub> O <sub>6</sub>  | 6/trough/9/2.77                                                      |
| 9  | Pt <sub>38</sub> O <sub>8</sub>  | 8/hcp/11/4.09                                                        |
| 10 | Pt <sub>38</sub> O <sub>8</sub>  | 8/fcc/10/3.68                                                        |
| 11 | Pt <sub>38</sub> O <sub>12</sub> | 12/bridge/8/3.67                                                     |
| 12 | Pt <sub>38</sub> O <sub>16</sub> | 16/hcp/11/4.09                                                       |
| 13 | Pt <sub>38</sub> O <sub>16</sub> | 16/fcc/10/3.68                                                       |
| 14 | Pt <sub>38</sub> O <sub>18</sub> | 6/trough/9/2.77, 12/bridge/8/3.67                                    |
| 15 | Pt <sub>38</sub> O <sub>24</sub> | 24/hcp/11/4.09                                                       |
| 16 | Pt <sub>38</sub> O <sub>24</sub> | 24/bridge/8/3.5                                                      |



Table S2: (continued)

| #  | Formula                          | Configuration ( $N_s$ /Type/CN/ $\overline{CN}$ )  |
|----|----------------------------------|----------------------------------------------------|
| 17 | Pt <sub>38</sub> O <sub>24</sub> | 24/fcc/10/3.68                                     |
| 18 | Pt <sub>38</sub> O <sub>30</sub> | 24/hcp/11/4.09, 6/trough/9/2.77                    |
| 19 | Pt <sub>38</sub> O <sub>30</sub> | 24/fcc/10/3.68, 6/trough/9/2.77                    |
| 20 | Pt <sub>38</sub> O <sub>30</sub> | 24/bridge/8/3.5, 6/trough/9/2.77                   |
| 21 | Pt <sub>38</sub> O <sub>36</sub> | 24/hcp/11/4.09, 12/bridge/8/3.67                   |
| 22 | Pt <sub>38</sub> O <sub>36</sub> | 24/bridge/8/3.5, 12/bridge/8/3.67                  |
| 23 | Pt <sub>38</sub> O <sub>36</sub> | 24/fcc/10/3.68, 12/bridge/8/3.67                   |
| 24 | Pt <sub>38</sub> O <sub>42</sub> | 24/hcp/11/4.09, 6/trough/9/2.77, 12/bridge/8/3.67  |
| 25 | Pt <sub>38</sub> O <sub>42</sub> | 24/bridge/8/3.5, 6/trough/9/2.77, 12/bridge/8/3.67 |
| 26 | Pt <sub>38</sub> O <sub>42</sub> | 24/fcc/10/3.68, 6/trough/9/2.77, 12/bridge/8/3.67  |
| 27 | Pt <sub>38</sub> O <sub>48</sub> | 24/hcp/11/4.09, 24/fcc/10/3.68                     |
| 28 | Pt <sub>38</sub> O <sub>48</sub> | 24/bridge/8/3.5, 24/fcc/10/3.68                    |
| 29 | Pt <sub>38</sub> O <sub>48</sub> | 24/hcp/11/4.09, 24/bridge/8/3.5                    |
| 30 | Pt <sub>38</sub> O <sub>54</sub> | 24/hcp/11/4.09, 24/fcc/10/3.68, 6/trough/9/2.77    |
| 31 | Pt <sub>38</sub> O <sub>54</sub> | 24/bridge/8/3.5, 24/fcc/10/3.68, 6/trough/9/2.77   |
| 32 | Pt <sub>38</sub> O <sub>54</sub> | 24/hcp/11/4.09, 24/bridge/8/3.5, 6/trough/9/2.77   |
| 33 | Pt <sub>38</sub> O <sub>60</sub> | 24/hcp/11/4.09, 24/fcc/10/3.68, 12/bridge/8/3.67   |

Table S2: (continued)

| #  | Formula                          | Configuration ( $N_s$ /Type/CN/ $\overline{CN}$ )                  |
|----|----------------------------------|--------------------------------------------------------------------|
| 34 | Pt <sub>38</sub> O <sub>60</sub> | 24/bridge/8/3.5, 24/fcc/10/3.68, 12/bridge/8/3.67                  |
| 35 | Pt <sub>38</sub> O <sub>66</sub> | 24/hcp/11/4.09, 24/fcc/10/3.68, 6/trough/9/2.77, 12/bridge/8/3.67  |
| 36 | Pt <sub>38</sub> O <sub>66</sub> | 24/bridge/8/3.5, 24/fcc/10/3.68, 6/trough/9/2.77, 12/bridge/8/3.67 |
| 37 | Pt <sub>38</sub> O <sub>66</sub> | 24/hcp/11/4.09, 24/bridge/8/3.5, 6/trough/9/2.77, 12/bridge/8/3.67 |
| 38 | Pt <sub>79</sub> O <sub>1</sub>  | 1/bridge/8/3.61                                                    |
| 39 | Pt <sub>79</sub> O <sub>1</sub>  | 1/bridge/9/4.33                                                    |
| 40 | Pt <sub>79</sub> O <sub>1</sub>  | 1/fcc/11/4.41                                                      |
| 41 | Pt <sub>79</sub> O <sub>1</sub>  | 1/fcc/15/5.86                                                      |
| 42 | Pt <sub>79</sub> O <sub>1</sub>  | 1/hcp/11/4.45                                                      |
| 43 | Pt <sub>79</sub> O <sub>1</sub>  | 1/trough/9/2.92                                                    |
| 44 | Pt <sub>79</sub> O <sub>1</sub>  | 1/hcp/14/5.68                                                      |
| 45 | Pt <sub>79</sub> O <sub>1</sub>  | 1/ontop/6/4.08                                                     |
| 46 | Pt <sub>79</sub> O <sub>1</sub>  | 1/ontop/7/5.0                                                      |
| 47 | Pt <sub>79</sub> O <sub>1</sub>  | 1/ontop/9/6.67                                                     |
| 48 | Pt <sub>79</sub> O <sub>6</sub>  | 6/trough/9/2.92                                                    |
| 49 | Pt <sub>79</sub> O <sub>8</sub>  | 8/fcc/11/4.41                                                      |
| 50 | Pt <sub>79</sub> O <sub>8</sub>  | 8/fcc/15/5.86                                                      |

Table S2: (continued)

| #  | Formula                          | Configuration ( $N_s$ /Type/CN/ $\overline{CN}$ ) |
|----|----------------------------------|---------------------------------------------------|
| 51 | Pt <sub>79</sub> O <sub>14</sub> | 8/fcc/15/5.86, 6/trough/9/2.92                    |
| 52 | Pt <sub>79</sub> O <sub>16</sub> | 16/fcc/11/4.41                                    |
| 53 | Pt <sub>79</sub> O <sub>24</sub> | 24/hcp/11/4.45                                    |
| 54 | Pt <sub>79</sub> O <sub>24</sub> | 24/bridge/9/4.33                                  |
| 55 | Pt <sub>79</sub> O <sub>24</sub> | 24/fcc/11/4.41                                    |
| 56 | Pt <sub>79</sub> O <sub>24</sub> | 24/bridge/8/3.61                                  |
| 57 | Pt <sub>79</sub> O <sub>24</sub> | 24/fcc/11/4.41                                    |
| 58 | Pt <sub>79</sub> O <sub>24</sub> | 24/hcp/14/5.68                                    |
| 59 | Pt <sub>79</sub> O <sub>30</sub> | 24/hcp/11/4.45, 6/trough/9/2.92                   |
| 60 | Pt <sub>79</sub> O <sub>30</sub> | 24/bridge/9/4.33, 6/trough/9/2.92                 |
| 61 | Pt <sub>79</sub> O <sub>30</sub> | 6/trough/9/2.92, 24/hcp/14/5.68                   |
| 62 | Pt <sub>79</sub> O <sub>30</sub> | 24/bridge/8/3.61, 6/trough/9/2.92                 |
| 63 | Pt <sub>79</sub> O <sub>32</sub> | 24/bridge/9/4.33, 8/fcc/15/5.86                   |
| 64 | Pt <sub>79</sub> O <sub>32</sub> | 24/bridge/8/3.61, 8/fcc/15/5.86                   |
| 65 | Pt <sub>79</sub> O <sub>32</sub> | 8/fcc/15/5.86, 24/hcp/11/4.45                     |
| 66 | Pt <sub>79</sub> O <sub>32</sub> | 8/fcc/15/5.86, 24/hcp/14/5.68                     |
| 67 | Pt <sub>79</sub> O <sub>38</sub> | 24/bridge/9/4.33, 8/fcc/15/5.86, 6/trough/9/2.92  |

Table S2: (continued)

| #  | Formula                          | Configuration ( $N_s$ /Type/CN/ $\overline{CN}$ )   |
|----|----------------------------------|-----------------------------------------------------|
| 68 | Pt <sub>79</sub> O <sub>38</sub> | 8/fcc/15/5.86, 24/hcp/11/4.45, 6/trough/9/2.92      |
| 69 | Pt <sub>79</sub> O <sub>48</sub> | 48/fcc/11/4.41                                      |
| 70 | Pt <sub>79</sub> O <sub>48</sub> | 24/bridge/9/4.33, 24/hcp/11/4.45                    |
| 71 | Pt <sub>79</sub> O <sub>48</sub> | 24/bridge/8/3.61, 24/hcp/14/5.68                    |
| 72 | Pt <sub>79</sub> O <sub>48</sub> | 24/bridge/9/4.33, 24/hcp/14/5.68                    |
| 73 | Pt <sub>79</sub> O <sub>48</sub> | 24/hcp/11/4.45, 24/hcp/14/5.68                      |
| 74 | Pt <sub>79</sub> O <sub>48</sub> | 24/bridge/8/3.61, 24/bridge/9/4.33                  |
| 75 | Pt <sub>79</sub> O <sub>48</sub> | 24/bridge/8/3.61, 24/hcp/11/4.45                    |
| 76 | Pt <sub>79</sub> O <sub>54</sub> | 48/fcc/11/4.41, 6/trough/9/2.92                     |
| 77 | Pt <sub>79</sub> O <sub>54</sub> | 24/bridge/9/4.33, 24/hcp/11/4.45, 6/trough/9/2.92   |
| 78 | Pt <sub>79</sub> O <sub>54</sub> | 24/bridge/9/4.33, 6/trough/9/2.92, 24/hcp/14/5.68   |
| 79 | Pt <sub>79</sub> O <sub>54</sub> | 24/hcp/11/4.45, 6/trough/9/2.92, 24/hcp/14/5.68     |
| 80 | Pt <sub>79</sub> O <sub>54</sub> | 24/bridge/8/3.61, 24/bridge/9/4.33, 6/trough/9/2.92 |
| 81 | Pt <sub>79</sub> O <sub>56</sub> | 24/bridge/9/4.33, 8/fcc/15/5.86, 24/hcp/11/4.45     |
| 82 | Pt <sub>79</sub> O <sub>56</sub> | 48/fcc/11/4.41, 8/fcc/15/5.86                       |
| 83 | Pt <sub>79</sub> O <sub>56</sub> | 24/bridge/8/3.61, 24/bridge/9/4.33, 8/fcc/15/5.86   |
| 84 | Pt <sub>79</sub> O <sub>56</sub> | 24/bridge/8/3.61, 8/fcc/15/5.86, 24/hcp/11/4.45     |

Table S2: (continued)

| #   | Formula                          | Configuration ( $N_s$ /Type/CN/ $\overline{CN}$ )                 |
|-----|----------------------------------|-------------------------------------------------------------------|
| 85  | Pt <sub>79</sub> O <sub>62</sub> | 48/fcc/11/4.41, 8/fcc/15/5.86, 6/trough/9/2.92                    |
| 86  | Pt <sub>79</sub> O <sub>62</sub> | 24/bridge/9/4.33, 8/fcc/15/5.86, 24/hcp/11/4.45, 6/trough/9/2.92  |
| 87  | Pt <sub>79</sub> O <sub>72</sub> | 24/bridge/8/3.61, 48/fcc/11/4.41                                  |
| 88  | Pt <sub>79</sub> O <sub>72</sub> | 48/fcc/11/4.41, 24/hcp/11/4.45                                    |
| 89  | Pt <sub>79</sub> O <sub>72</sub> | 24/bridge/9/4.33, 24/hcp/11/4.45, 24/hcp/14/5.68                  |
| 90  | Pt <sub>79</sub> O <sub>72</sub> | 24/bridge/9/4.33, 48/fcc/11/4.41                                  |
| 91  | Pt <sub>79</sub> O <sub>72</sub> | 24/bridge/8/3.61, 24/bridge/9/4.33, 24/hcp/11/4.45                |
| 92  | Pt <sub>79</sub> O <sub>72</sub> | 24/bridge/8/3.61, 24/bridge/9/4.33, 24/hcp/14/5.68                |
| 93  | Pt <sub>79</sub> O <sub>72</sub> | 24/bridge/8/3.61, 24/hcp/11/4.45, 24/hcp/14/5.68                  |
| 94  | Pt <sub>79</sub> O <sub>78</sub> | 24/bridge/8/3.61, 48/fcc/11/4.41, 6/trough/9/2.92                 |
| 95  | Pt <sub>79</sub> O <sub>78</sub> | 24/bridge/9/4.33, 24/hcp/11/4.45, 6/trough/9/2.92, 24/hcp/14/5.68 |
| 96  | Pt <sub>79</sub> O <sub>78</sub> | 24/bridge/9/4.33, 48/fcc/11/4.41, 6/trough/9/2.92                 |
| 97  | Pt <sub>79</sub> O <sub>80</sub> | 24/bridge/8/3.61, 48/fcc/11/4.41, 8/fcc/15/5.86                   |
| 98  | Pt <sub>79</sub> O <sub>80</sub> | 24/bridge/9/4.33, 48/fcc/11/4.41, 8/fcc/15/5.86                   |
| 99  | Pt <sub>79</sub> O <sub>80</sub> | 24/bridge/8/3.61, 24/bridge/9/4.33, 8/fcc/15/5.86, 24/hcp/11/4.45 |
| 100 | Pt <sub>79</sub> O <sub>80</sub> | 24/bridge/8/3.61, 24/bridge/9/4.33, 8/fcc/15/5.86, 24/hcp/14/5.68 |
| 101 | Pt <sub>79</sub> O <sub>80</sub> | 24/bridge/9/4.33, 8/fcc/15/5.86, 24/hcp/11/4.45, 24/hcp/14/5.68   |

Table S2: (continued)

| #   | Formula                           | Configuration ( $N_s$ /Type/CN/ $\overline{CN}$ )                                   |
|-----|-----------------------------------|-------------------------------------------------------------------------------------|
| 102 | Pt <sub>79</sub> O <sub>86</sub>  | 24/bridge/9/4.33, 8/fcc/15/5.86, 24/hcp/11/4.45, 6/trough/9/2.92, 24/hcp/14/5.68    |
| 103 | Pt <sub>79</sub> O <sub>86</sub>  | 24/bridge/9/4.33, 48/fcc/11/4.41, 8/fcc/15/5.86, 6/trough/9/2.92                    |
| 104 | Pt <sub>79</sub> O <sub>96</sub>  | 24/bridge/8/3.61, 48/fcc/11/4.41, 24/hcp/11/4.45                                    |
| 105 | Pt <sub>79</sub> O <sub>96</sub>  | 24/bridge/8/3.61, 24/bridge/9/4.33, 48/fcc/11/4.41                                  |
| 106 | Pt <sub>79</sub> O <sub>96</sub>  | 24/bridge/8/3.61, 24/bridge/9/4.33, 24/hcp/11/4.45, 24/hcp/14/5.68                  |
| 107 | Pt <sub>79</sub> O <sub>102</sub> | 24/bridge/8/3.61, 24/bridge/9/4.33, 24/hcp/11/4.45, 6/trough/9/2.92, 24/hcp/14/5.68 |
| 108 | Pt <sub>79</sub> O <sub>104</sub> | 24/bridge/8/3.61, 24/bridge/9/4.33, 48/fcc/11/4.41, 8/fcc/15/5.86                   |
| 109 | Pt <sub>79</sub> O <sub>104</sub> | 24/bridge/8/3.61, 24/bridge/9/4.33, 8/fcc/15/5.86, 24/hcp/11/4.45, 24/hcp/14/5.68   |
| 110 | Pt <sub>79</sub> O <sub>128</sub> | 24/bridge/8/3.61, 24/bridge/9/4.33, 48/fcc/11/4.41, 8/fcc/15/5.86, 24/hcp/11/4.45   |
| 111 | Pt <sub>116</sub> O <sub>1</sub>  | 1/bridge/9/4.33                                                                     |
| 112 | Pt <sub>116</sub> O <sub>1</sub>  | 1/bridge/8/3.89                                                                     |
| 113 | Pt <sub>116</sub> O <sub>1</sub>  | 1/trough/13/4.46                                                                    |
| 114 | Pt <sub>116</sub> O <sub>1</sub>  | 1/fcc/10/4.14                                                                       |
| 115 | Pt <sub>116</sub> O <sub>1</sub>  | 1/bridge/11/5.5                                                                     |
| 116 | Pt <sub>116</sub> O <sub>1</sub>  | 1/hcp/12/4.95                                                                       |
| 117 | Pt <sub>116</sub> O <sub>1</sub>  | 1/fcc/13/5.23                                                                       |
| 118 | Pt <sub>116</sub> O <sub>1</sub>  | 1/hcp/16/6.41                                                                       |

Table S2: (continued)

| #   | Formula                           | Configuration ( $N_s$ /Type/CN/ $\overline{CN}$ )  |
|-----|-----------------------------------|----------------------------------------------------|
| 119 | Pt <sub>116</sub> O <sub>1</sub>  | 1/ontop/6/4.17                                     |
| 120 | Pt <sub>116</sub> O <sub>1</sub>  | 1/ontop/7/5.17                                     |
| 121 | Pt <sub>116</sub> O <sub>1</sub>  | 1/ontop/8/6.33                                     |
| 122 | Pt <sub>116</sub> O <sub>8</sub>  | 8/hcp/16/6.41                                      |
| 123 | Pt <sub>116</sub> O <sub>12</sub> | 12/bridge/8/3.89                                   |
| 124 | Pt <sub>116</sub> O <sub>20</sub> | 12/bridge/8/3.89, 8/hcp/16/6.41                    |
| 125 | Pt <sub>116</sub> O <sub>24</sub> | 24/fcc/10/4.14                                     |
| 126 | Pt <sub>116</sub> O <sub>24</sub> | 24/fcc/13/5.23                                     |
| 127 | Pt <sub>116</sub> O <sub>24</sub> | 24/trough/13/4.46                                  |
| 128 | Pt <sub>116</sub> O <sub>32</sub> | 24/fcc/10/4.14, 8/hcp/16/6.41                      |
| 129 | Pt <sub>116</sub> O <sub>36</sub> | 12/bridge/8/3.89, 24/trough/13/4.46                |
| 130 | Pt <sub>116</sub> O <sub>36</sub> | 12/bridge/8/3.89, 24/fcc/13/5.23                   |
| 131 | Pt <sub>116</sub> O <sub>44</sub> | 12/bridge/8/3.89, 24/trough/13/4.46, 8/hcp/16/6.41 |
| 132 | Pt <sub>116</sub> O <sub>48</sub> | 48/bridge/9/4.33                                   |
| 133 | Pt <sub>116</sub> O <sub>48</sub> | 24/trough/13/4.46, 24/fcc/10/4.14                  |
| 134 | Pt <sub>116</sub> O <sub>48</sub> | 48/hcp/12/4.95                                     |
| 135 | Pt <sub>116</sub> O <sub>48</sub> | 24/trough/13/4.46, 24/fcc/13/5.23                  |

Table S2: (continued)

| #   | Formula                           | Configuration ( $N_s$ /Type/CN/ $\overline{CN}$ )                  |
|-----|-----------------------------------|--------------------------------------------------------------------|
| 136 | Pt <sub>116</sub> O <sub>48</sub> | 24/fcc/10/4.14, 24/fcc/13/5.23                                     |
| 137 | Pt <sub>116</sub> O <sub>56</sub> | 48/bridge/9/4.33, 8/hcp/16/6.41                                    |
| 138 | Pt <sub>116</sub> O <sub>56</sub> | 24/trough/13/4.46, 24/fcc/10/4.14, 8/hcp/16/6.41                   |
| 139 | Pt <sub>116</sub> O <sub>60</sub> | 12/bridge/8/3.89, 48/hcp/12/4.95                                   |
| 140 | Pt <sub>116</sub> O <sub>60</sub> | 48/bridge/9/4.33, 12/bridge/8/3.89                                 |
| 141 | Pt <sub>116</sub> O <sub>60</sub> | 12/bridge/8/3.89, 24/trough/13/4.46, 24/fcc/13/5.23                |
| 142 | Pt <sub>116</sub> O <sub>68</sub> | 48/bridge/9/4.33, 12/bridge/8/3.89, 8/hcp/16/6.41                  |
| 143 | Pt <sub>116</sub> O <sub>72</sub> | 48/bridge/9/4.33, 24/fcc/10/4.14                                   |
| 144 | Pt <sub>116</sub> O <sub>72</sub> | 24/trough/13/4.46, 48/hcp/12/4.95                                  |
| 145 | Pt <sub>116</sub> O <sub>72</sub> | 48/bridge/9/4.33, 24/fcc/13/5.23                                   |
| 146 | Pt <sub>116</sub> O <sub>72</sub> | 24/trough/13/4.46, 24/fcc/10/4.14, 24/fcc/13/5.23                  |
| 147 | Pt <sub>116</sub> O <sub>80</sub> | 48/bridge/9/4.33, 24/fcc/10/4.14, 8/hcp/16/6.41                    |
| 148 | Pt <sub>116</sub> O <sub>80</sub> | 24/trough/13/4.46, 48/hcp/12/4.95, 8/hcp/16/6.41                   |
| 149 | Pt <sub>116</sub> O <sub>84</sub> | 12/bridge/8/3.89, 24/trough/13/4.46, 48/hcp/12/4.95                |
| 150 | Pt <sub>116</sub> O <sub>84</sub> | 48/bridge/9/4.33, 12/bridge/8/3.89, 24/fcc/13/5.23                 |
| 151 | Pt <sub>116</sub> O <sub>92</sub> | 12/bridge/8/3.89, 24/trough/13/4.46, 48/hcp/12/4.95, 8/hcp/16/6.41 |
| 152 | Pt <sub>116</sub> O <sub>96</sub> | 48/bridge/9/4.33, 24/fcc/10/4.14, 24/fcc/13/5.23                   |



Table S2: (continued)

| #   | Formula                            | Configuration ( $N_s$ /Type/CN/ $\overline{CN}$ )                 |
|-----|------------------------------------|-------------------------------------------------------------------|
| 153 | Pt <sub>116</sub> O <sub>96</sub>  | 48/bridge/9/4.33, 48/hcp/12/4.95                                  |
| 154 | Pt <sub>116</sub> O <sub>104</sub> | 48/bridge/9/4.33, 48/hcp/12/4.95, 8/hcp/16/6.41                   |
| 155 | Pt <sub>116</sub> O <sub>108</sub> | 48/bridge/9/4.33, 12/bridge/8/3.89, 48/hcp/12/4.95                |
| 156 | Pt <sub>116</sub> O <sub>116</sub> | 48/bridge/9/4.33, 12/bridge/8/3.89, 48/hcp/12/4.95, 8/hcp/16/6.41 |
| 157 | Pt <sub>201</sub> O <sub>1</sub>   | 1/bridge/9/4.39                                                   |
| 158 | Pt <sub>201</sub> O <sub>1</sub>   | 1/bridge/9/4.44                                                   |
| 159 | Pt <sub>201</sub> O <sub>1</sub>   | 1/fcc/11/4.59                                                     |
| 160 | Pt <sub>201</sub> O <sub>1</sub>   | 1/bridge/11/5.5                                                   |
| 161 | Pt <sub>201</sub> O <sub>1</sub>   | 1/trough/13/4.5                                                   |
| 162 | Pt <sub>201</sub> O <sub>1</sub>   | 1/hcp/12/5.09                                                     |
| 163 | Pt <sub>201</sub> O <sub>1</sub>   | 1/fcc/15/6.41                                                     |
| 164 | Pt <sub>201</sub> O <sub>1</sub>   | 1/hcp/14/5.95                                                     |
| 165 | Pt <sub>201</sub> O <sub>1</sub>   | 1/fcc/13/5.5                                                      |
| 166 | Pt <sub>201</sub> O <sub>1</sub>   | 1/hcp/16/6.95                                                     |
| 167 | Pt <sub>201</sub> O <sub>1</sub>   | 1/ontop/6/4.25                                                    |
| 168 | Pt <sub>201</sub> O <sub>1</sub>   | 1/ontop/7/5.0                                                     |
| 169 | Pt <sub>201</sub> O <sub>1</sub>   | 1/ontop/7/5.17                                                    |

Table S2: (continued)

| #   | Formula                           | Configuration ( $N_s$ /Type/CN/ $\overline{\text{CN}}$ ) |
|-----|-----------------------------------|----------------------------------------------------------|
| 170 | Pt <sub>201</sub> O <sub>1</sub>  | 1/ontop/8/6.33                                           |
| 171 | Pt <sub>201</sub> O <sub>1</sub>  | 1/ontop/9/7.5                                            |
| 172 | Pt <sub>201</sub> O <sub>24</sub> | 24/bridge/9/4.44                                         |
| 173 | Pt <sub>201</sub> O <sub>24</sub> | 24/hcp/14/5.95                                           |
| 174 | Pt <sub>201</sub> O <sub>24</sub> | 24/fcc/13/5.5                                            |
| 175 | Pt <sub>201</sub> O <sub>48</sub> | 24/fcc/11/4.59, 24/trough/13/4.5                         |
| 176 | Pt <sub>201</sub> O <sub>48</sub> | 48/fcc/11/4.59                                           |
| 177 | Pt <sub>201</sub> O <sub>48</sub> | 24/bridge/9/4.44, 24/fcc/13/5.5                          |
| 178 | Pt <sub>201</sub> O <sub>48</sub> | 24/bridge/9/4.44, 24/fcc/15/6.41                         |
| 179 | Pt <sub>201</sub> O <sub>48</sub> | 48/bridge/9/4.39                                         |
| 180 | Pt <sub>201</sub> O <sub>48</sub> | 48/hcp/12/5.09                                           |
| 181 | Pt <sub>201</sub> O <sub>48</sub> | 24/bridge/9/4.44, 24/trough/13/4.5                       |
| 182 | Pt <sub>201</sub> O <sub>48</sub> | 24/trough/13/4.5, 24/hcp/14/5.95                         |
| 183 | Pt <sub>201</sub> O <sub>72</sub> | 48/fcc/11/4.59, 24/trough/13/4.5                         |
| 184 | Pt <sub>201</sub> O <sub>72</sub> | 24/fcc/11/4.59, 24/trough/13/4.5, 24/hcp/12/5.09         |
| 185 | Pt <sub>201</sub> O <sub>72</sub> | 48/fcc/11/4.59, 24/fcc/15/6.41                           |
| 186 | Pt <sub>201</sub> O <sub>72</sub> | 48/bridge/9/4.39, 24/fcc/15/6.41                         |

Table S2: (continued)

| #   | Formula                           | Configuration ( $N_s$ /Type/CN/ $\overline{CN}$ )                 |
|-----|-----------------------------------|-------------------------------------------------------------------|
| 187 | Pt <sub>201</sub> O <sub>72</sub> | 24/bridge/9/4.44, 24/trough/13/4.5, 24/fcc/15/6.41                |
| 188 | Pt <sub>201</sub> O <sub>72</sub> | 48/bridge/9/4.39, 24/hcp/14/5.95                                  |
| 189 | Pt <sub>201</sub> O <sub>72</sub> | 24/bridge/9/4.44, 48/hcp/12/5.09                                  |
| 190 | Pt <sub>201</sub> O <sub>72</sub> | 24/bridge/9/4.44, 24/trough/13/4.5, 24/fcc/13/5.5                 |
| 191 | Pt <sub>201</sub> O <sub>72</sub> | 24/bridge/9/4.44, 24/trough/13/4.5, 24/hcp/16/6.95                |
| 192 | Pt <sub>201</sub> O <sub>72</sub> | 48/bridge/9/4.39, 24/bridge/9/4.44                                |
| 193 | Pt <sub>201</sub> O <sub>72</sub> | 24/trough/13/4.5, 24/hcp/14/5.95, 24/fcc/13/5.5                   |
| 194 | Pt <sub>201</sub> O <sub>72</sub> | 48/bridge/9/4.39, 24/bridge/11/5.5                                |
| 195 | Pt <sub>201</sub> O <sub>88</sub> | 48/fcc/11/4.59, 24/trough/13/4.5, 8/fcc/15/6.41, 8/hcp/16/6.95    |
| 196 | Pt <sub>201</sub> O <sub>96</sub> | 48/bridge/9/4.39, 48/fcc/11/4.59                                  |
| 197 | Pt <sub>201</sub> O <sub>96</sub> | 24/bridge/9/4.44, 24/trough/13/4.5, 48/hcp/12/5.09                |
| 198 | Pt <sub>201</sub> O <sub>96</sub> | 48/bridge/9/4.39, 24/bridge/9/4.44, 24/fcc/13/5.5                 |
| 199 | Pt <sub>201</sub> O <sub>96</sub> | 48/fcc/11/4.59, 24/trough/13/4.5, 24/fcc/15/6.41                  |
| 200 | Pt <sub>201</sub> O <sub>96</sub> | 48/bridge/9/4.39, 24/bridge/9/4.44, 24/fcc/15/6.41                |
| 201 | Pt <sub>201</sub> O <sub>96</sub> | 48/bridge/9/4.39, 24/bridge/9/4.44, 24/hcp/14/5.95                |
| 202 | Pt <sub>201</sub> O <sub>96</sub> | 24/bridge/9/4.44, 24/trough/13/4.5, 24/hcp/14/5.95, 24/fcc/13/5.5 |
| 203 | Pt <sub>201</sub> O <sub>96</sub> | 48/bridge/9/4.39, 24/bridge/9/4.44, 24/bridge/11/5.5              |

Table S2: (continued)

| #   | Formula                            | Configuration ( $N_s$ /Type/CN/ $\overline{\text{CN}}$ )        |
|-----|------------------------------------|-----------------------------------------------------------------|
| 204 | P <sub>t201</sub> O <sub>120</sub> | 48/bridge/9/4.39, 48/fcc/11/4.59, 24/fcc/15/6.41                |
| 205 | P <sub>t201</sub> O <sub>120</sub> | 48/bridge/9/4.39, 48/fcc/11/4.59, 24/fcc/13/5.5                 |
| 206 | P <sub>t201</sub> O <sub>120</sub> | 48/fcc/11/4.59, 24/trough/13/4.5, 24/fcc/15/6.41, 24/fcc/13/5.5 |
| 207 | P <sub>t201</sub> O <sub>120</sub> | 48/bridge/9/4.39, 48/fcc/11/4.59, 24/bridge/11/5.5              |

**Table S3: Averaged Pt-Pt nearest-neighbor distances  $\langle r_{\text{Pt-Pt}} \rangle$  (in Å), averaged Pt-Pt coordination numbers  $\langle \text{CN}_{\text{Pt-Pt}} \rangle$ , averaged Pt-O nearest-neighbor distances  $\langle r_{\text{Pt-O}} \rangle$  and averaged Pt-O coordination numbers  $\langle \text{CN}_{\text{Pt-O}} \rangle$  calculated for different model systems.**

| System                             | $\langle r_{\text{Pt-Pt}} \rangle$ | $\langle \text{CN}_{\text{Pt-Pt}} \rangle$ | $\langle r_{\text{Pt-O}} \rangle$ | $\langle \text{CN}_{\text{Pt-O}} \rangle$ |
|------------------------------------|------------------------------------|--------------------------------------------|-----------------------------------|-------------------------------------------|
| Pt <sub>38</sub>                   | 2.73                               | 7.6                                        | -                                 | -                                         |
| Pt <sub>79</sub>                   | 2.75                               | 8.5                                        | -                                 | -                                         |
| Pt <sub>116</sub>                  | 2.75                               | 8.9                                        | -                                 | -                                         |
| Pt <sub>201</sub>                  | 2.77                               | 9.4                                        | -                                 | -                                         |
| fcc Pt bulk                        | 2.77                               | 12.0                                       | -                                 | -                                         |
| Pt <sub>38</sub> O <sub>76</sub>   | 3.13                               | 2.2                                        | 2.01                              | 4.8                                       |
| Pt <sub>79</sub> O <sub>158</sub>  | 3.14                               | 1.8                                        | 2.01                              | 5.0                                       |
| Pt <sub>116</sub> O <sub>232</sub> | 3.11                               | 1.8                                        | 2.01                              | 5.1                                       |
| Pt <sub>201</sub> O <sub>402</sub> | 3.14                               | 1.8                                        | 2.02                              | 5.2                                       |
| $\beta$ -PtO <sub>2</sub> bulk     | 3.18                               | 2.0                                        | 2.03                              | 6.0                                       |

**Table S4: Formation energies of the Pt nanoparticles and two extended Pt surfaces relative to bulk fcc Pt, and the formation energies PtO<sub>2</sub> nanoparticles relative to the formation energy of bulk PtO<sub>2</sub>, each in eV per Pt atom.**

| System                             | Formation energy |
|------------------------------------|------------------|
| Pt <sub>38</sub>                   | 1.13             |
| Pt <sub>79</sub>                   | 0.84             |
| Pt <sub>116</sub>                  | 0.75             |
| Pt <sub>201</sub>                  | 0.58             |
| fcc Pt(100)                        | 0.58             |
| fcc Pt(111)                        | 0.40             |
| Pt <sub>38</sub> O <sub>76</sub>   | 1.31             |
| Pt <sub>79</sub> O <sub>158</sub>  | 1.04             |
| Pt <sub>116</sub> O <sub>232</sub> | 0.92             |
| Pt <sub>201</sub> O <sub>402</sub> | 0.81             |

Listing S1: Structure of the bulk  $\beta$ -PtO<sub>2</sub> (in CIF format) used to create the PtO<sub>2</sub> nanoparticles

```
# data source: https://doi.org/10.17188/1189224
data_PtO2
_symmetry_space_group_name_H-M   'P 1'
_cell_length_a    3.19178800
_cell_length_b    4.55466800
_cell_length_c    4.61138100
_cell_angle_alpha 90.00000000
_cell_angle_beta  90.00000000
_cell_angle_gamma 90.00000000
_symmetry_Int_Tables_number      1
_chemical_formula_structural      PtO2
_chemical_formula_sum             'Pt2 O4'
_cell_volume                      67.03811115
_cell_formula_units_Z             2
loop_
  _symmetry_equiv_pos_site_id
  _symmetry_equiv_pos_as_xyz
  1 'x, y, z'
loop_
  _atom_site_type_symbol
  _atom_site_label
  _atom_site_symmetry_multiplicity
  _atom_site_fract_x
  _atom_site_fract_y
  _atom_site_fract_z
  _atom_site_occupancy
Pt Pt0 1 0.00000000 0.00000000 0.00000000 1
Pt Pt1 1 0.50000000 0.50000000 0.50000000 1
O O2 1 0.00000000 0.36239000 0.25916500 1
O O3 1 0.00000000 0.63761000 0.74083500 1
O O4 1 0.50000000 0.13761000 0.75916500 1
O O5 1 0.50000000 0.86239000 0.24083500 1
```
